# Supplementary material
Source: PubMed Central journal article supplement (PMC3508134)

**Table S1, related to Figure 1:** The total number of sequenced reads obtained from the Oct4, Sox2, Klf4, and c-Myc ChIP reactions in infected and non-infected (mock) cells treated with dox for 48 hr and the total sequenced tags from non-immuno enriched DNA (input) samples are indicated. Multiple reads that aligned to the same genomic regions were not considered in our analysis only unique reads are shown. Genomic coverage is displayed as a fraction of the human genome (hg18 build 36) that aligned with sequenced reads.

|           | Total read count |                  | Unique reads  |                  |
|-----------|------------------|------------------|---------------|------------------|
| Factor    | aligned reads    | genomic coverage | aligned reads | genomic coverage |
| Input 1   | 35206971         | 0.39 X           | 33516500      | 0.37 X           |
| Input 2   | 36887920         | 0.41 X           | 32849269      | 0.37 X           |
| Oct4      | 38052089         | 0.42 X           | 35865026      | 0.4 X            |
| Sox2      | 30030469         | 0.33 X           | 29208966      | 0.32 X           |
| Klf4      | 36521658         | 0.41 X           | 33573804      | 0.37 X           |
| cMyc      | 36969964         | 0.41 X           | 34070915      | 0.38 X           |
| Oct4 mock | 34523589         | 0.38 X           | 22168416      | 0.25 X           |
| cMyc mock | 32605607         | 0.36 X           | 24482375      | 0.27 X           |

## Notes for Tables S2, S3, and S4, as separate Excel files:

### - Table S2, related to Figures 2, 3, 6, 7 and S2B, S3C, S5B, and S7F (excel file):

The DNA oligonucleotides used as primers for ChIP-qPCR are listed along with the amplified genomic regions in the hg-18 build 36 human genome and the associated RefSeq genes, and the validated OSKM occupancy at 48 hr. \*Asterisks denote sites used for ChIP-qPCR experiments shown in Figures 7B and S7F.

- **Table S3, related to Figures 1 and 2 (excel file):** Genes' sites of occupancy (bound vs. not bound) by O, S, K, M at 48 hr, as summarized in Figure 1C, along with gene expression correlations in uninfected human fibroblasts, human iPS cells, and human ES cells (Lowry et al. 2008) (see Figure 2A).

Note that we observed a few peaks in the coding sequences of the *POU5f1* (*Oct4*), *SOX2*, *KLF4*, and *c-MYC* genes, which could be due to contamination with lentivirus proviral DNA that contains the coding sequences in the infected cells. Thus, these genes were provisionally classified as “not bound” in Table S3.

### - Table S4, related to Figures 6 and 7 (excel file): OSKM-DBR data, including:

- Tab 1:      - genome location of 264 OSKM-DBRs (HG18)
- genome location of overlapping iPS DMRs (Lister et al. 2011)
- genome location and extent of overlap with lamin-associated domains (LADs) (Guelen et al. 2008)
- Tab 2:      - RefSeq genes within OSKM-DBRs
- Tab 3:      - Gene Ontology (GO) analysis of genes within OSKM-DBR
- Tab 4:      - Repeat element enrichment within OSKM-DBRs

**Table S5, related to Figures 1 and S1C:** The DNA oligonucleotides used as primers for RT-qPCR are listed along with the associated genes' names

| <b>gene</b>     | <b>forward Primer</b>              | <b>reverse Primer</b>              |
|-----------------|------------------------------------|------------------------------------|
| AFP             | AGC TTG GTG GTG GAT GAA AC         | CCC TCT TCA GC AAA GCA GAC         |
| Endogenous OCT4 | GAC AGG GGG AGG GGA GGA GCT AGG    | CTT CCC TCC AAC CAG TTG CCC CAA AC |
| Ker             | CAG ATG CTG TGT CCC TGT GT         | TTC AGA TCC AGA AGG GGA TG         |
| NANOG           | CAG CCC CGA TTC TTC CAC CAG TCC C  | CGG AAG ATT CCC AGT CGG GTT CAC C  |
| NCAM            | ATG GAA ACT CTA TTA AAG TGA ACC TG | TAG ACC TCA TAC TCA GCA TTC CAG T  |
| Pax6            | CCA GAA AGG ATG CCT CAT AAA GG     | TCT GCG CGC CCC TAG TTA            |
| RUNX1           | CCC TAG GGG ATG TTC CAG AT         | TGA AGC TTT TCC CTC TTC CA         |
| T               | ACCCAGTTCATAGCGGTGAC               | CCATTGGGAGTACCCAGGTT               |
| GAPDH           | TGT TGC CAT CAA TGA CCC CTT        | CTC CAC GAC GTA CTC AGC G          |

Soufi/Zaret Supplementary Figure 1, related to Figure 1

**A.** Conditions under which Oct4, Sox2, Klf4, and c-Myc (OSKM) can be co-induced in virtually all fibroblasts by 48 hr

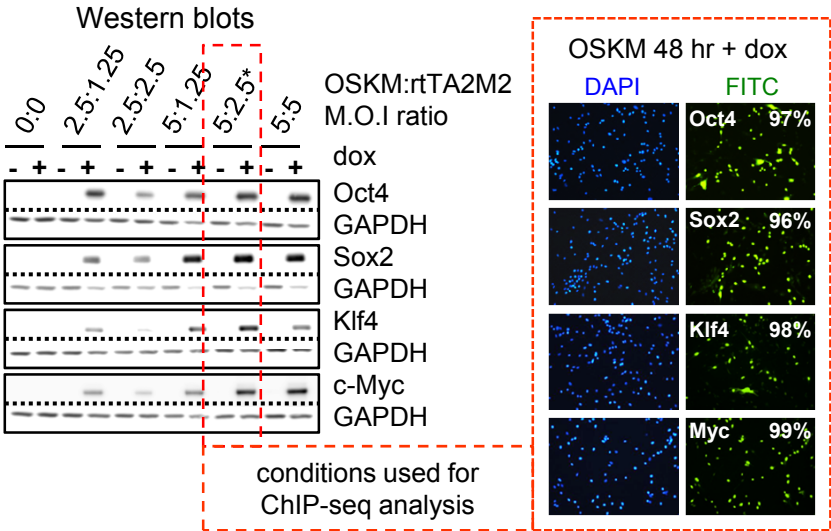

**B.** Pluripotency markers expressed by hFib-iPS

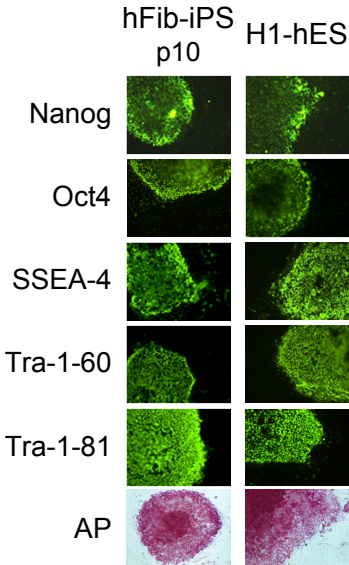

**C.** hFib-iPS lines form embryoid bodies and differentiate into derivatives of the three germ layers (RT-qPCR)

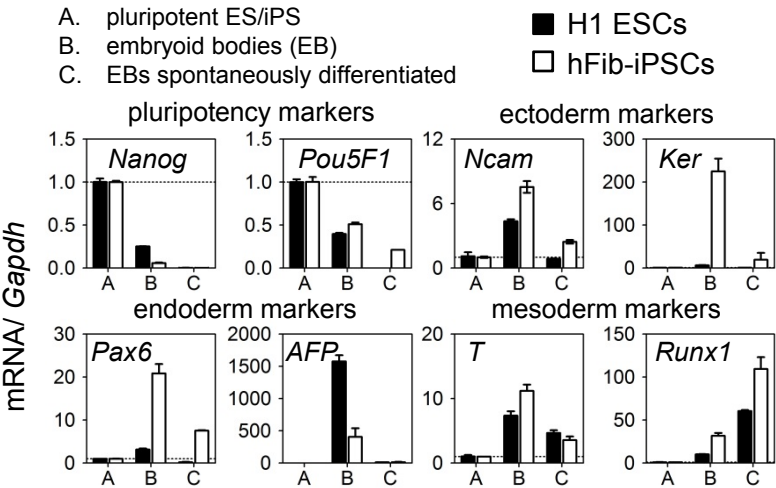

**D.** Efficiency of reprogramming

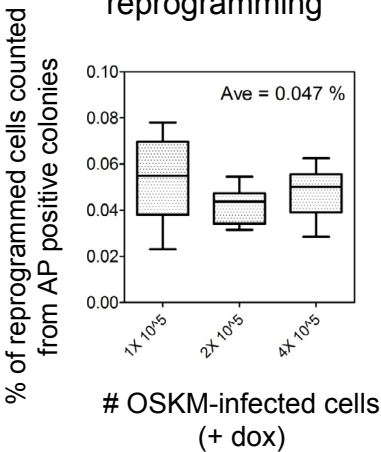

**E.** Sonicated DNA used for ChIP-Seq

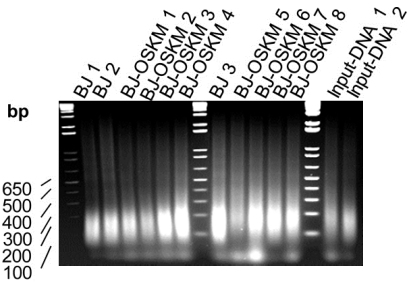

**F.** Westerns with antibodies used for OSKM-ChIP

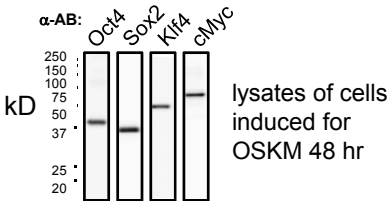



Soufi/Zaret Supplementary Figure 3, related to Figures 1 and 2

A. OSKM-bound regions at 48 hr are conserved between human and mouse

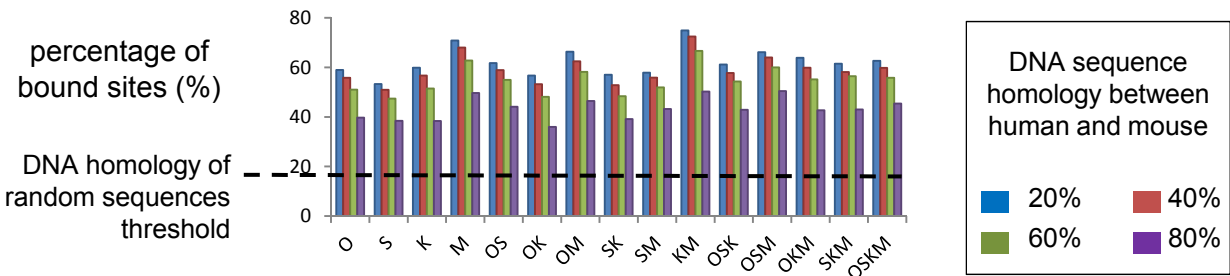

B. OSKM bound regions in 48 hours in human displayed as peaks

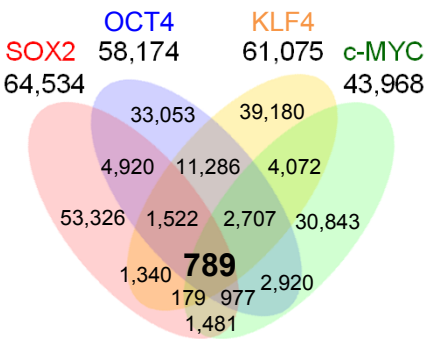

OSKM peaks that show 60% homology between human and mouse

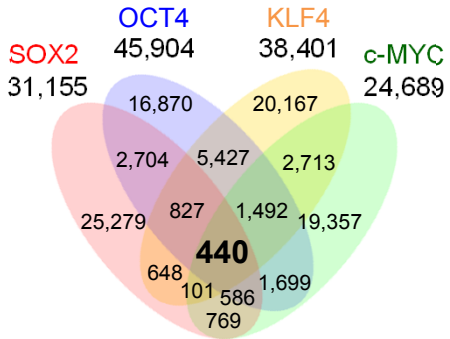

C. ChIP-qPCR validated enrichment over input DNA for genes relevant to reprogramming

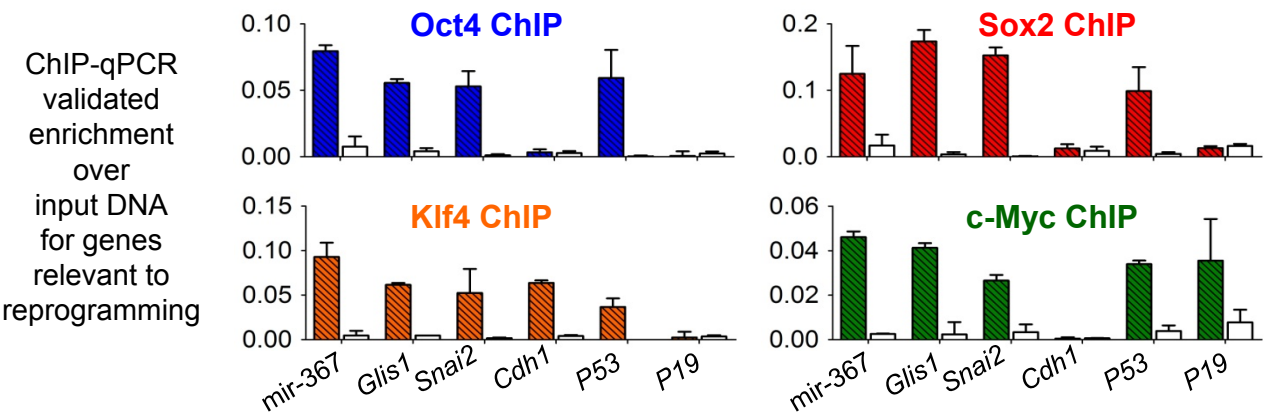

D. phosphorylation and signal transduction

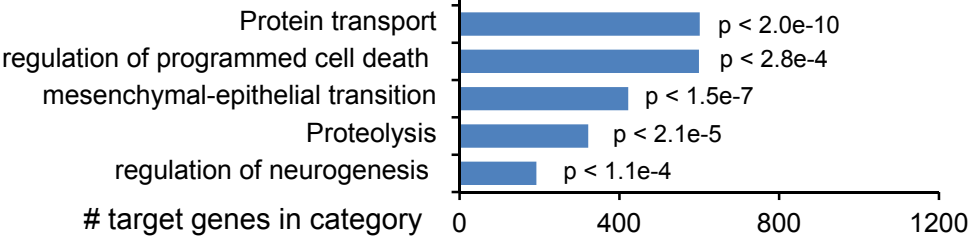

Soufi/Zaret Supplementary Figure 4, related to Figure 2

A. Sites bound by OSKM in early reprogramming are predominantly distal to the TSS in both the human and mouse genomes, compared to binding in ES cells

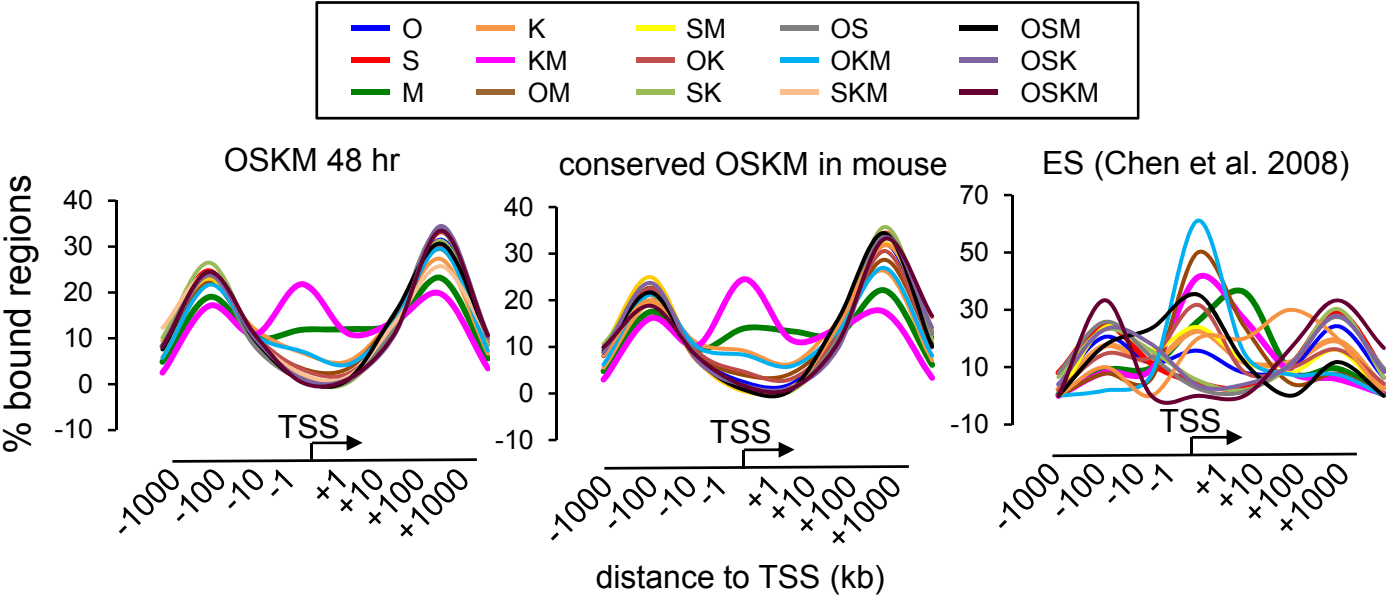

B. By 48 hr, all of O,S,K,M associate with numerous functional enhancers in the VISTA database

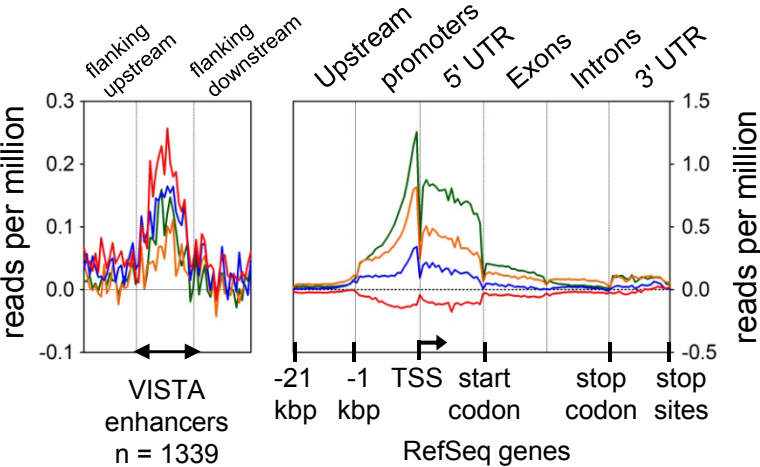

C. OSKM access the *MyoD1* enhancer elements at 48 hr

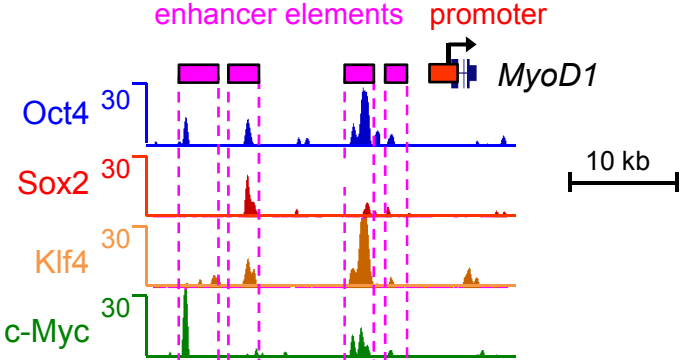

Soufi/Zaret Supplementary Figure 5, related to Figure 3

A. Sonicated chromatin used for ChIP-qPCR to investigate the role of c-Myc in early reprogramming

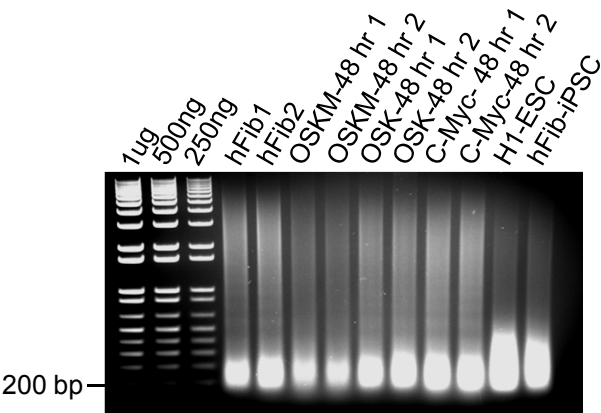

B. ☐ non-infected ☒ OSKM 48 hr ☒ OSK 48 hr ☒ c-Myc 48 hr

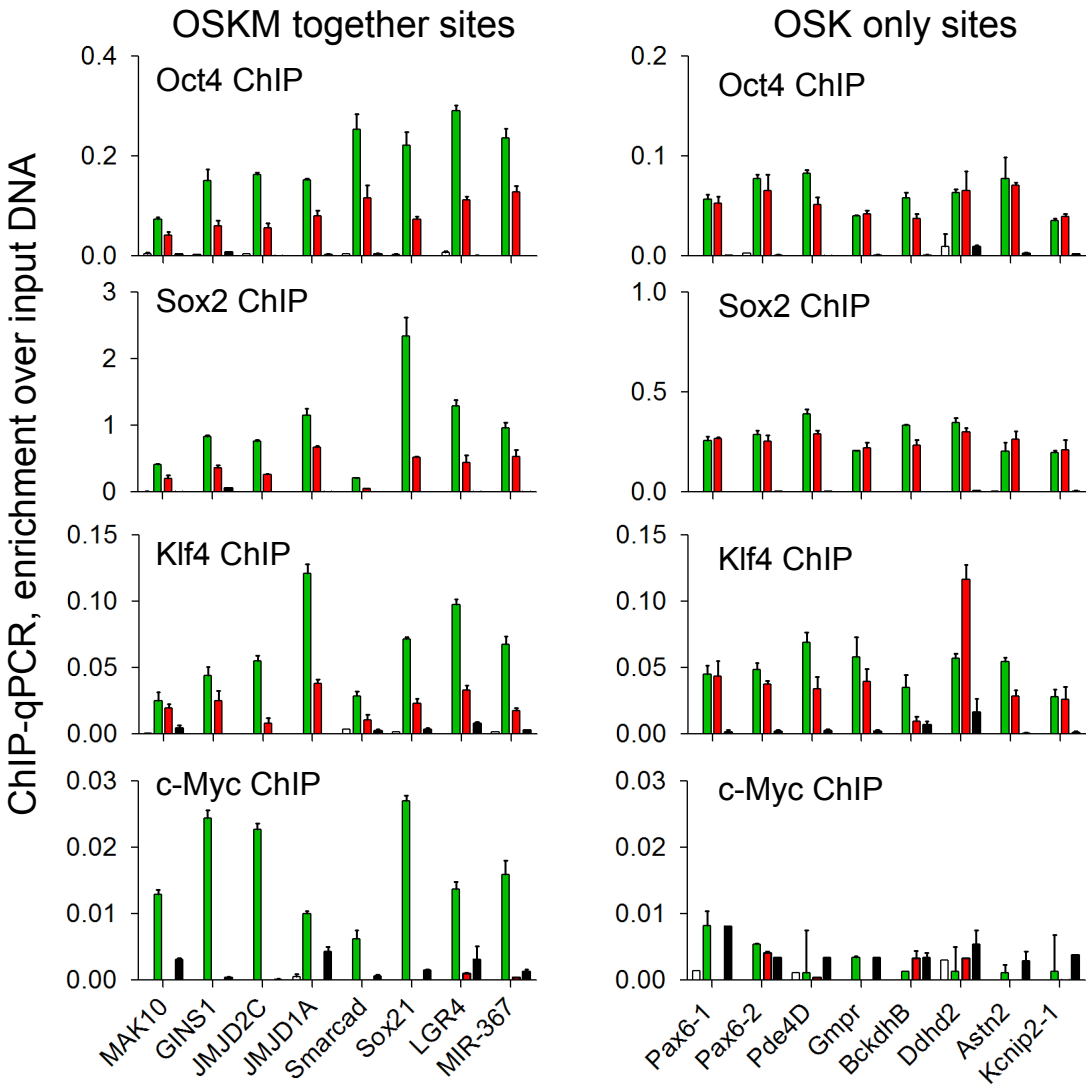

Soufi/Zaret Supplementary Figure 6, related to Figure 5

A. Sites enriched for open chromatin marks that OSKM initially bind in fibroblasts are predominantly distributed around promoters (TSS)

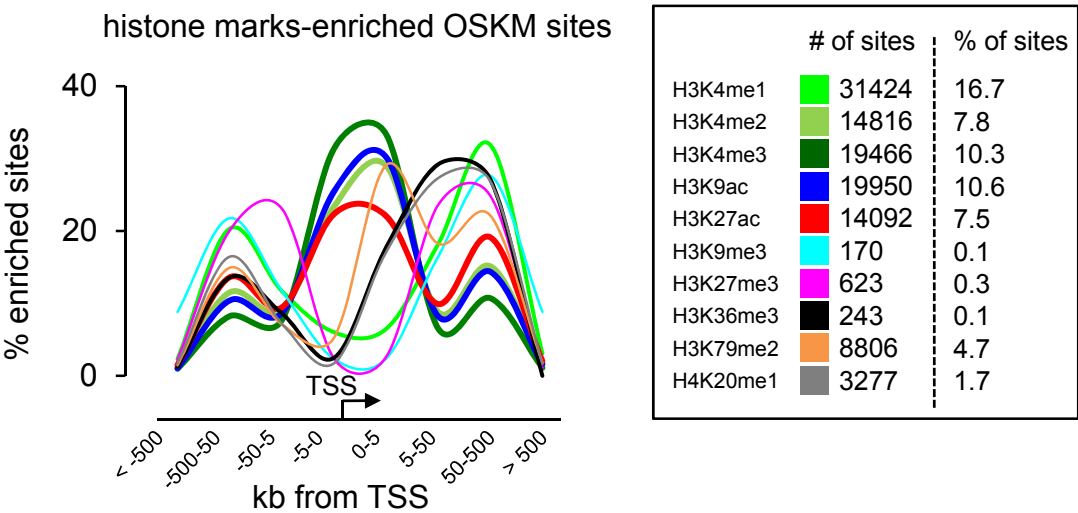

B. The OSKM factors are associated with H3K4me1-enriched and non-enriched enhancer elements found in the VISTA database

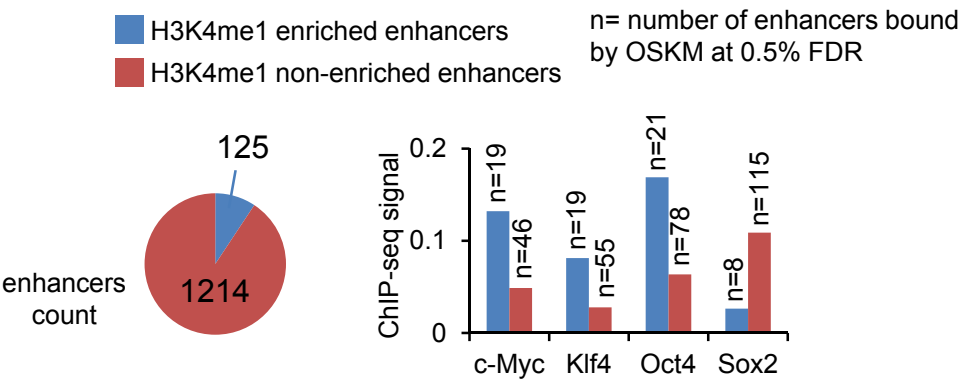

C. A subset of c-Myc and Klf4 bind promoters of genes with pre-existing H3K4me2

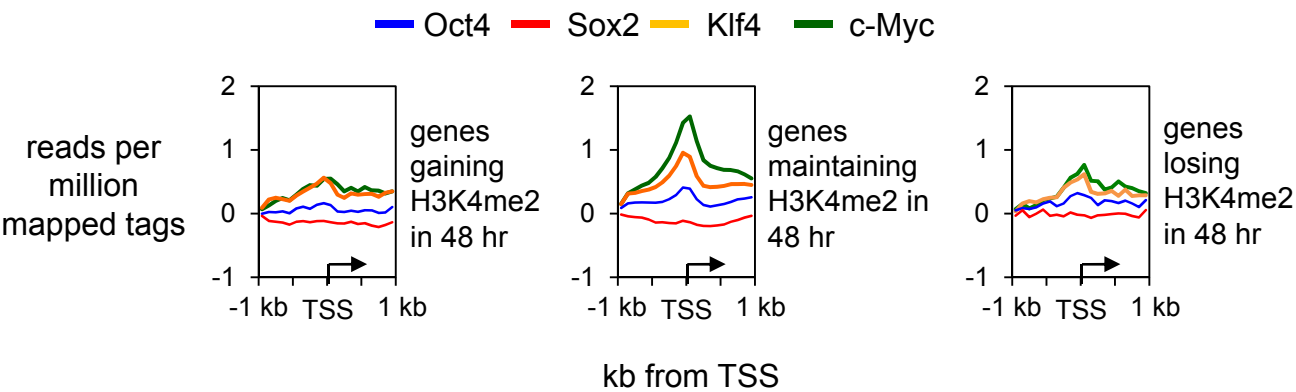

Soufi/Zaret Supplementary Figure 7, related to Figures 6 and 7

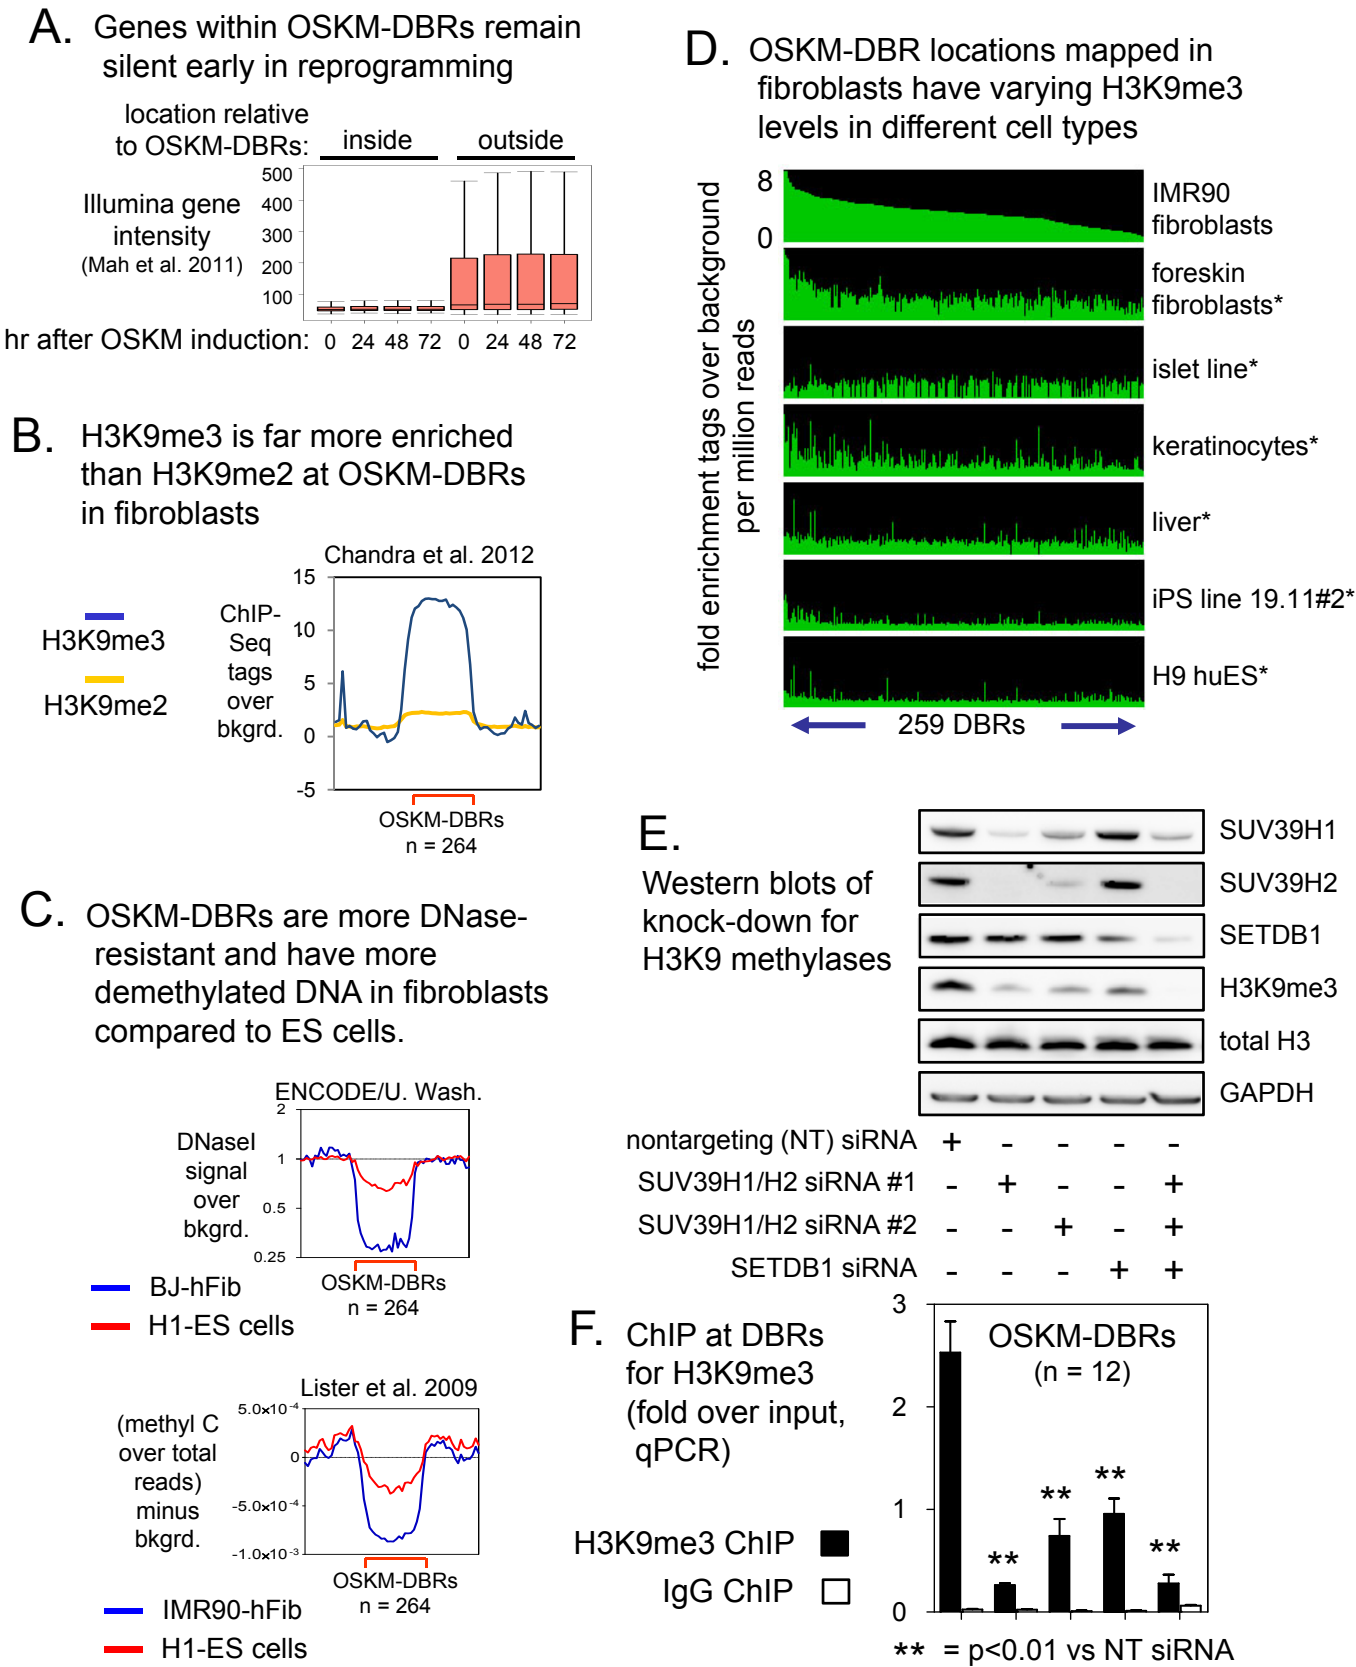

Supplement: NIHMS419243-supplement-02.pdf [file NIHMS419243-supplement-02.pdf]
